# Supplementary material for: Generation of liquid crystallinity from a Td-symmetry central unit
Source: Royal Society of Chemistry journal article supplement (doi:10.1039/c6sm01019a), 2016-01-01
Supplement: c6sm01019a1.pdf [file c6sm01019a1.pdf]

## Supporting Information

# **Generation of Liquid Crystallinity from a $T_d$ -Symmetry Central Unit**

Sayed Mir Sayed, Bao-Ping Lin and Hong Yang\*

*School of Chemistry and Chemical Engineering, Jiangsu Province Hi-Tech Key Laboratory for Bio-  
medical Research, Jiangsu Optoelectronic Functional Materials and Engineering Laboratory,  
Southeast University, Nanjing, 211189, China*

---

## 1. UV-vis spectroscopy:

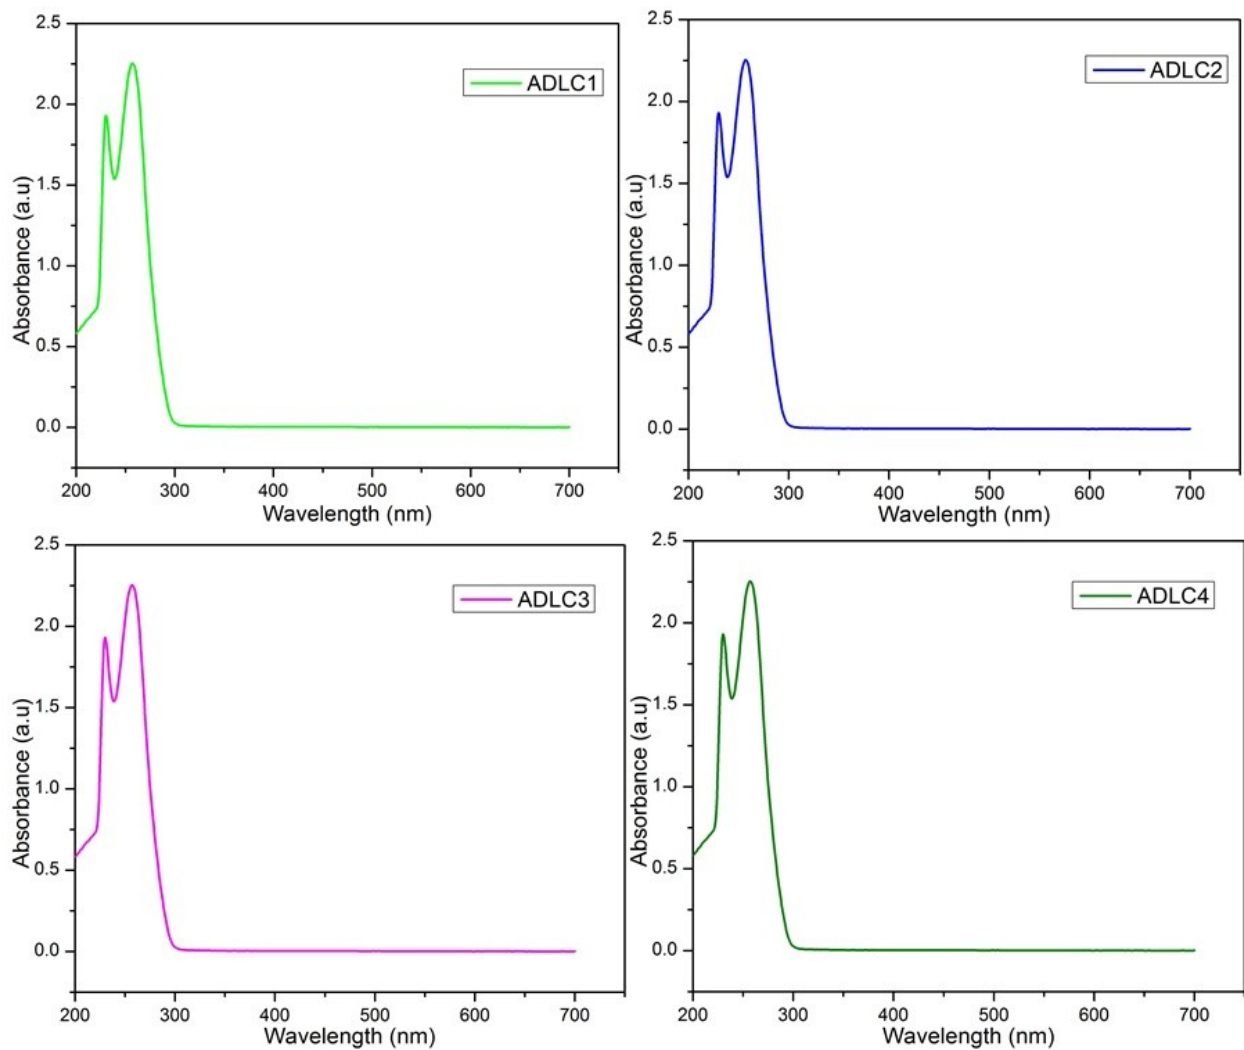

**Fig. S1** UV-vis absorption spectra of **ADLCs 1-4** in  $\text{CH}_2\text{Cl}_2$  Solution.

## 2. Differential Scanning Calorimetry(DSC):

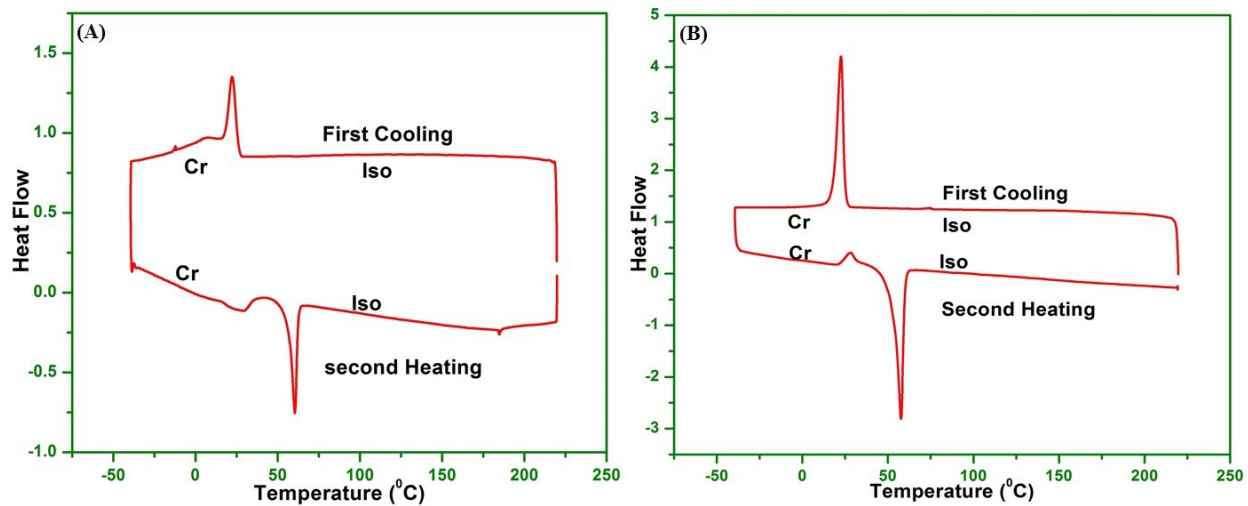

**Fig. S2** DSC thermograms of **ADLC1** (A) and **ADLC4** (B) obtained during the second heating and first cooling cycle at 10  $^{\circ}\text{C}/\text{min}$ .

### 3. Wide Angle X-Ray Scattering (WAXS):

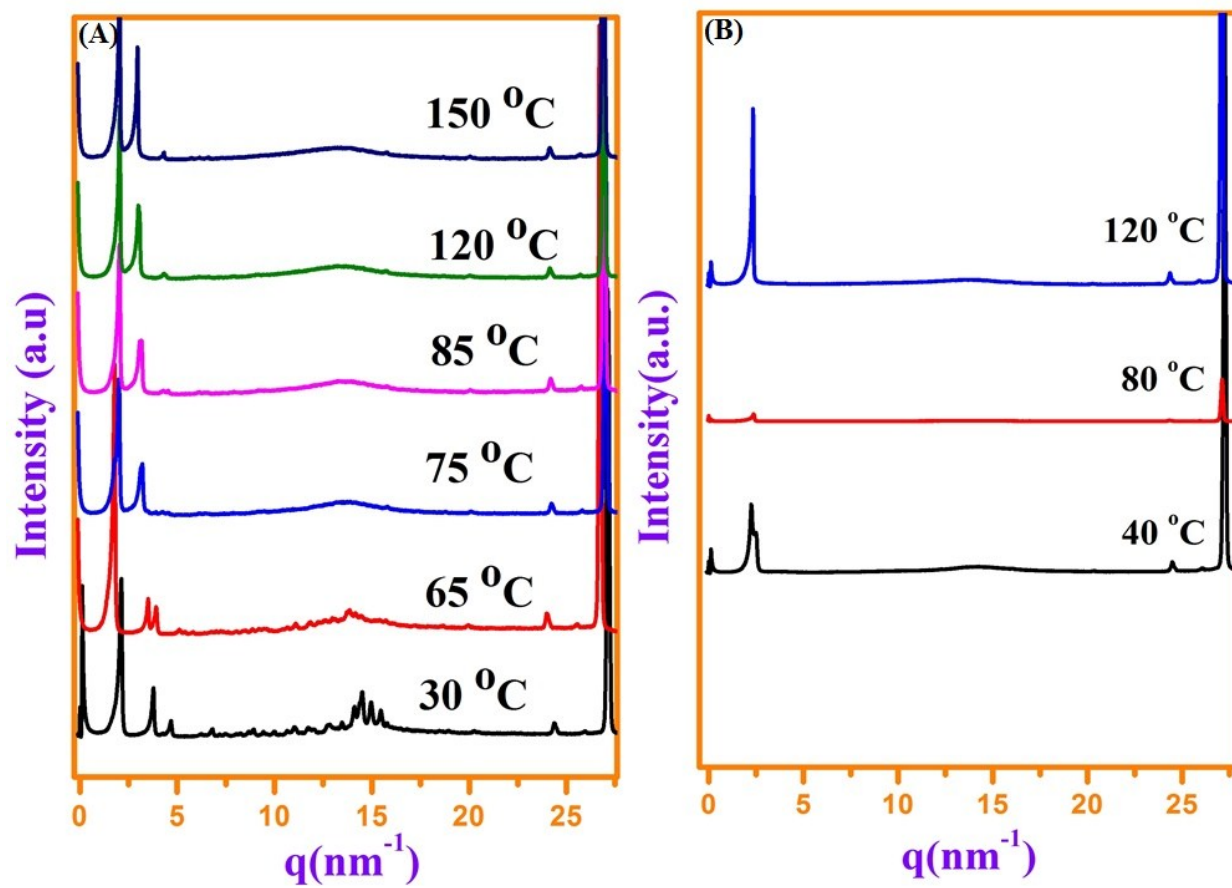

Fig. S3 Comparative XRD profiles of (A) ADLC2 and (B) ADLC3 at different temperatures.
